# Supplementary material
Source: MDPI journal article supplement (https://www.mdpi.com/1999-4907/8/6/216)
Supplement: s1 [file s1]

**Table S1.** Forest age class definition (1 = presence of forest, 0 = absence).

| 1985 | 1991 | 2001 | 2015 | Age class |
| --- | --- | --- | --- | --- |
| 1 | 1 | 1 | 1 | A4 |
| 0 | 1 | 1 | 1 | A3 |
| 0 | 0 | 1 | 1 | A2 |
| 1 | 0 | 1 | 1 | A2 |
| 0 | 0 | 0 | 1 | A1 |
| 1 | 1 | 0 | 1 | A1 |
| 1 | 0 | 0 | 1 | A1 |
| 0 | 1 | 0 | 1 | A1 |
| 1 | 1 | 1 | 1 | A4 |

**Table S2.** Forest age classes extensions in 2015.

| Forest Age Class | Estimated Age | Area (Ha) | % Forest Class |
| --- | --- | --- | --- |
| A1 | ≤ 14 years | 5,011.45 | 54.58% |
| A2 | 14-24 years | 5,725.98 |
| A3 | 24-30 years | 1,733.21 |
| A4 | ≥ 30 years | 10,377.83 | 45.42% |

**Table S3.** Error-adjusted area estimates and 95% confidence intervals (CI), following [44,45].

| Class | Error-adjusted area (ha) | ±95% CI  (ha) |
| --- | --- | --- |
| 1985 |  |  |
| Forest | 12.312,52 | 4.097,45 |
| Shrubland | 36.382,25 | 5.284,21 |
| Agriculture and built-up lands | 92.906,62 | 3.478,78 |
| 2001 |  |  |
| Forest | 24.326,70 | 3.071,98 |
| Shrubland | 38.494,34 | 5.178,54 |
| Agriculture and built-up lands | 78.780,36 | 5.398,71 |
| 2015 |  |  |
| Forest | 26.498,11 | 4.030,27 |
| Shrubland | 33.131,43 | 5.453,31 |
| Agriculture and built-up lands | 81.971,86 | 4.873,11 |
